# Supplementary material for: Health Systems and Self-Reported Medication Adherence in Patients with Hypertension: A cross-sectional comparison of Jamaica and Colombia
Source: Research Square preprint supplement (doi:10.21203/rs.3.rs-7454001/v1), 2025-09-05
Supplement: Supplementary file 1 [file c8163e7a602e54f0ae20dbc3.pdf]

**Table 2: Jamaican and Colombian patients' experiences at most recent health care encounter in each health system**

| Patients’ experiences                                             | Jamaica<br>N=288 | Colombia<br>N=288 | p-value |
|-------------------------------------------------------------------|------------------|-------------------|---------|
| Doctor discussed blood pressure treatment plan – yes, n (%)       | 162 (56.8)       | 196 (73.5)        | 0.001   |
| Doctor discussed medication changes, n (%)                        |                  |                   |         |
| Yes                                                               | 121 (42.9)       | 122 (41.0)        | 0.25    |
| No                                                                | 46 (15.4)        | 50 (22.6)         |         |
| Medications did not change                                        | 121 (41.7)       | 116 (36.4)        |         |
| Pharmacist discussed substitution of medication, n (%)            |                  |                   |         |
| Yes                                                               | 118 (41.3)       | 29 (7.8)          | <0.001  |
| No                                                                | 69 (23.5)        | 80 (36.1)         |         |
| Medications not substituted                                       | 101 (35.2)       | 179 (56.1)        |         |
| Wait time for registration, n (%)                                 |                  |                   |         |
| <30 minutes                                                       | 58 (21.6)        | 227 (83.4)        | <0.001  |
| 30-60 minutes                                                     | 95 (30.7)        | 54 (15.0)         |         |
| >60 minutes                                                       | 135 (47.8)       | 7 (1.6)           |         |
| Wait time to see the doctor, n (%)                                |                  |                   |         |
| Did not see doctor                                                | 1 (0.6)          | 5 (1.3)           | <0.001  |
| <30 minutes                                                       | 38 (12.2)        | 257 (91.0)        |         |
| 30-60 minutes                                                     | 143 (50.6)       | 24 (7.4)          |         |
| >60 minutes                                                       | 106 (36.6)       | 2 (0.3)           |         |
| Wait time to get medications, n (%)                               |                  |                   |         |
| There is no pharmacy at the clinic, / did not use clinic pharmacy | 57 (16.9)        | 57 (19.4)         | <0.001  |
| <30 minutes                                                       | 9 (1.8)          | 174 (64.0)        |         |
| 30-60 minutes                                                     | 46 (14.9)        | 57 (16.6)         |         |
| >60 minutes                                                       | 176 (66.3)       | 0                 |         |

**\* Fisher's exact test was conducted due to small sample size, \*\* P-values exclude patients who these data were not applicable**
